# Supplementary material for: A Phase I, Prospective, Randomized, Open-labeled Study to Evaluate the Safety, Tolerability, and Immunogenicity of Booster Dose with MVC-COV1901 or MVC-COV1901(Beta) SARS-CoV-2 Vaccine in Adults
Source: bioRxiv or medRxiv preprint supplement (doi:10.1101/2022.08.29.22279317), 2022-08-31
Supplement: Supplementary file [file media-1.pdf]

**Table S1. Solicited Local Adverse Events after the Booster Dosing**

|                                | <b>Group A:<br/>Two Prior Doses of MVC-COV1901</b>      |                                                               |                                                               |                                                     | <b>Group B:<br/>Three Prior Doses of MVC-COV1901</b>    |                                                               |                                                               |                                                     |
|--------------------------------|---------------------------------------------------------|---------------------------------------------------------------|---------------------------------------------------------------|-----------------------------------------------------|---------------------------------------------------------|---------------------------------------------------------------|---------------------------------------------------------------|-----------------------------------------------------|
|                                | <b>MVC-COV1901<br/>(15 mcg)<br/>(N = 15),<br/>n (%)</b> | <b>MVC-COV1901<br/>(15 mcg, Beta)<br/>(N = 15),<br/>n (%)</b> | <b>MVC-COV1901<br/>(25 mcg, Beta)<br/>(N = 15),<br/>n (%)</b> | <b>All<br/>Participants<br/>(N = 45),<br/>n (%)</b> | <b>MVC-COV1901<br/>(15 mcg)<br/>(N = 21),<br/>n (%)</b> | <b>MVC-COV1901<br/>(15 mcg, Beta)<br/>(N = 21),<br/>n (%)</b> | <b>MVC-COV1901<br/>(25 mcg, Beta)<br/>(N = 20),<br/>n (%)</b> | <b>All<br/>Participants<br/>(N = 62),<br/>n (%)</b> |
| <b>Any Solicited Local AEs</b> | 10 (66.7)                                               | 11 (73.3)                                                     | 9 (60.0)                                                      | 30 (66.7)                                           | 13 (61.9)                                               | 12 (57.1)                                                     | 14 (70.0)                                                     | 39 (62.9)                                           |
| Grade 1                        | 10 (66.7)                                               | 11 (73.3)                                                     | 8 (53.3)                                                      | 29 (64.4)                                           | 13 (61.9)                                               | 11 (52.4)                                                     | 14 (70.0)                                                     | 38 (61.3)                                           |
| Grade 2                        | 0                                                       | 0                                                             | 1 (6.7)                                                       | 1 (2.2)                                             | 0                                                       | 1 (4.8)                                                       | 0                                                             | 1 (1.6)                                             |
| Grade 3                        | 0                                                       | 0                                                             | 0                                                             | 0                                                   | 0                                                       | 0                                                             | 0                                                             | 0                                                   |
| <b>Pain/Tenderness</b>         | 10 (66.7)                                               | 11 (73.3)                                                     | 9 (60.0)                                                      | 30 (66.7)                                           | 13 (61.9)                                               | 12 (57.1)                                                     | 14 (70.0)                                                     | 39 (62.9)                                           |
| Grade 1                        | 10 (66.7)                                               | 11 (73.3)                                                     | 8 (53.3)                                                      | 29 (64.4)                                           | 13 (61.9)                                               | 11 (52.4)                                                     | 14 (70.0)                                                     | 38 (61.3)                                           |
| Grade 2                        | 0                                                       | 0                                                             | 1 (6.7)                                                       | 1 (2.2)                                             | 0                                                       | 1 (4.8)                                                       | 0                                                             | 1 (1.6)                                             |
| Grade 3                        | 0                                                       | 0                                                             | 0                                                             | 0                                                   | 0                                                       | 0                                                             | 0                                                             | 0                                                   |
| <b>Erythema/Redness</b>        | 1 (6.7)                                                 | 0                                                             | 1 (6.7)                                                       | 2 (4.4)                                             | 0                                                       | 0                                                             | 0                                                             | 0                                                   |
| Grade 1                        | 1 (6.7)                                                 | 0                                                             | 1 (6.7)                                                       | 2 (4.4)                                             | 0                                                       | 0                                                             | 0                                                             | 0                                                   |
| Grade 2                        | 0                                                       | 0                                                             | 0                                                             | 0                                                   | 0                                                       | 0                                                             | 0                                                             | 0                                                   |
| Grade 3                        | 0                                                       | 0                                                             | 0                                                             | 0                                                   | 0                                                       | 0                                                             | 0                                                             | 0                                                   |
| <b>Induration/Swelling</b>     | 2 (13.3)                                                | 0                                                             | 3 (20.0)                                                      | 5 (11.1)                                            | 0                                                       | 1 (4.8)                                                       | 1 (5.0)                                                       | 2 (3.2)                                             |
| Grade 1                        | 2 (13.3)                                                | 0                                                             | 3 (20.0)                                                      | 5 (11.1)                                            | 0                                                       | 0                                                             | 1 (5.0)                                                       | 1 (1.6)                                             |
| Grade 2                        | 0                                                       | 0                                                             | 0                                                             | 0                                                   | 0                                                       | 1 (4.8)                                                       | 0                                                             | 1 (1.6)                                             |
| Grade 3                        | 0                                                       | 0                                                             | 0                                                             | 0                                                   | 0                                                       | 0                                                             | 0                                                             | 0                                                   |

Abbreviations: N = number of subjects in the population; n = number of subjects in the specific category. % = percentage of subjects with N as the denominator.

**Table S2. Solicited Systemic Adverse Events after the Booster Dosing**

|                                   | Group A:<br>Two Prior Doses of MVC-COV1901    |                                                     |                                                     |                                           | Group B:<br>Three Prior Doses of MVC-COV1901  |                                                     |                                                     |                                           |
|-----------------------------------|-----------------------------------------------|-----------------------------------------------------|-----------------------------------------------------|-------------------------------------------|-----------------------------------------------|-----------------------------------------------------|-----------------------------------------------------|-------------------------------------------|
|                                   | MVC-COV1901<br>(15 mcg)<br>(N = 15),<br>n (%) | MVC-COV1901<br>(15 mcg, Beta)<br>(N = 15),<br>n (%) | MVC-COV1901<br>(25 mcg, Beta)<br>(N = 15),<br>n (%) | All<br>Participants<br>(N = 45),<br>n (%) | MVC-COV1901<br>(15 mcg)<br>(N = 21),<br>n (%) | MVC-COV1901<br>(15 mcg, Beta)<br>(N = 21),<br>n (%) | MVC-COV1901<br>(25 mcg, Beta)<br>(N = 20),<br>n (%) | All<br>Participants<br>(N = 62),<br>n (%) |
| <b>Any Solicited Systemic AEs</b> | 9 (60.0)                                      | 9 (60.0)                                            | 9 (60.0)                                            | 27 (60.0)                                 | 9 (42.9)                                      | 7 (33.3)                                            | 13 (65.0)                                           | 29 (46.8)                                 |
| Grade 1                           | 7 (46.7)                                      | 8 (53.3)                                            | 6 (40.0)                                            | 21 (46.7)                                 | 7 (33.3)                                      | 6 (28.6)                                            | 12 (60.0)                                           | 25 (40.3)                                 |
| Grade 2                           | 1 (6.7)                                       | 1 (6.7)                                             | 2 (13.3)                                            | 4 (8.9)                                   | 2 (9.5)                                       | 1 (4.8)                                             | 0                                                   | 3 (4.8)                                   |
| Grade 3                           | 1 (6.7)                                       | 0                                                   | 1 (6.7)                                             | 2 (4.4)                                   | 0                                             | 0                                                   | 1 (5.0)                                             | 1 (1.6)                                   |
| <b>Fever</b>                      | 1 (6.7)                                       | 0                                                   | 1 (6.7)                                             | 2 (4.4)                                   | 0                                             | 0                                                   | 1 (5.0)                                             | 1 (1.6)                                   |
| Grade 1                           | 1 (6.7)                                       | 0                                                   | 1 (6.7)                                             | 2 (4.4)                                   | 0                                             | 0                                                   | 0                                                   | 0                                         |
| Grade 2                           | 0                                             | 0                                                   | 0                                                   | 0                                         | 0                                             | 0                                                   | 1 (5.0)                                             | 1 (1.6)                                   |
| Grade 3                           | 0                                             | 0                                                   | 0                                                   | 0                                         | 0                                             | 0                                                   | 0                                                   | 0                                         |
| <b>Malaise/Fatigue</b>            | 5 (33.3)                                      | 7 (46.7)                                            | 8 (53.3)                                            | 20 (44.4)                                 | 7 (33.3)                                      | 6 (28.6)                                            | 8 (40.0)                                            | 21 (33.9)                                 |
| Grade 1                           | 3 (20.0)                                      | 7 (46.7)                                            | 5 (33.3)                                            | 15 (33.3)                                 | 5 (23.8)                                      | 5 (23.8)                                            | 7 (35.0)                                            | 17 (27.4)                                 |
| Grade 2                           | 1 (6.7)                                       | 0                                                   | 2 (13.3)                                            | 3 (6.7)                                   | 2 (9.5)                                       | 1 (4.8)                                             | 0                                                   | 3 (4.8)                                   |
| Grade 3                           | 1 (6.7)                                       | 0                                                   | 1 (6.7)                                             | 2 (4.4)                                   | 0                                             | 0                                                   | 1 (5.0)                                             | 1 (1.6)                                   |
| <b>Myalgia</b>                    | 4 (26.7)                                      | 3 (20.0)                                            | 5 (33.3)                                            | 12 (26.7)                                 | 5 (23.8)                                      | 1 (4.8)                                             | 7 (35.0)                                            | 13 (21.0)                                 |
| Grade 1                           | 3 (20.0)                                      | 2 (13.3)                                            | 4 (26.7)                                            | 9 (20.0)                                  | 5 (23.8)                                      | 1 (4.8)                                             | 7 (35.0)                                            | 13 (21.0)                                 |
| Grade 2                           | 1 (6.7)                                       | 1 (6.7)                                             | 1 (6.7)                                             | 3 (6.7)                                   | 0                                             | 0                                                   | 0                                                   | 0                                         |
| Grade 3                           | 0                                             | 0                                                   | 0                                                   | 0                                         | 0                                             | 0                                                   | 0                                                   | 0                                         |
| <b>Headache</b>                   | 5 (33.3)                                      | 2 (13.3)                                            | 4 (26.7)                                            | 11 (24.4)                                 | 3 (14.3)                                      | 3 (14.3)                                            | 4 (20.0)                                            | 10 (16.1)                                 |
| Grade 1                           | 4 (26.7)                                      | 2 (13.3)                                            | 3 (20.0)                                            | 9 (20.0)                                  | 3 (14.3)                                      | 3 (14.3)                                            | 3 (15.0)                                            | 9 (14.5)                                  |

|                        | Group A:<br>Two Prior Doses of MVC-COV1901    |                                                     |                                                     |                                           | Group B:<br>Three Prior Doses of MVC-COV1901  |                                                     |                                                     |                                           |
|------------------------|-----------------------------------------------|-----------------------------------------------------|-----------------------------------------------------|-------------------------------------------|-----------------------------------------------|-----------------------------------------------------|-----------------------------------------------------|-------------------------------------------|
|                        | MVC-COV1901<br>(15 mcg)<br>(N = 15),<br>n (%) | MVC-COV1901<br>(15 mcg, Beta)<br>(N = 15),<br>n (%) | MVC-COV1901<br>(25 mcg, Beta)<br>(N = 15),<br>n (%) | All<br>Participants<br>(N = 45),<br>n (%) | MVC-COV1901<br>(15 mcg)<br>(N = 21),<br>n (%) | MVC-COV1901<br>(15 mcg, Beta)<br>(N = 21),<br>n (%) | MVC-COV1901<br>(25 mcg, Beta)<br>(N = 20),<br>n (%) | All<br>Participants<br>(N = 62),<br>n (%) |
| Grade 2                | 1 (6.7)                                       | 0                                                   | 1 (6.7)                                             | 2 (4.4)                                   | 0                                             | 0                                                   | 1 (5.0)                                             | 1 (1.6)                                   |
| Grade 3                | 0                                             | 0                                                   | 0                                                   | 0                                         | 0                                             | 0                                                   | 0                                                   | 0                                         |
| <b>Nausea/Vomiting</b> | 2 (13.3)                                      | 1 (6.7)                                             | 2 (13.3)                                            | 5 (11.1)                                  | 0                                             | 0                                                   | 1 (5.0)                                             | 1 (1.6)                                   |
| Grade 1                | 1 (6.7)                                       | 1 (6.7)                                             | 2 (13.3)                                            | 4 (8.9)                                   | 0                                             | 0                                                   | 1 (5.0)                                             | 1 (1.6)                                   |
| Grade 2                | 1 (6.7)                                       | 0                                                   | 0                                                   | 1 (2.2)                                   | 0                                             | 0                                                   | 0                                                   | 0                                         |
| Grade 3                | 0                                             | 0                                                   | 0                                                   | 0                                         | 0                                             | 0                                                   | 0                                                   | 0                                         |
| <b>Diarrhea</b>        | 5 (33.3)                                      | 1 (6.7)                                             | 2 (13.3)                                            | 8 (17.8)                                  | 1 (4.8)                                       | 3 (14.3)                                            | 5 (25.0)                                            | 9 (14.5)                                  |
| Grade 1                | 4 (26.7)                                      | 1 (6.7)                                             | 2 (13.3)                                            | 7 (15.6)                                  | 1 (4.8)                                       | 2 (9.5)                                             | 5 (25.0)                                            | 8 (12.9)                                  |
| Grade 2                | 0                                             | 0                                                   | 0                                                   | 0                                         | 0                                             | 1 (4.8)                                             | 0                                                   | 1 (1.6)                                   |
| Grade 3                | 1 (6.7)                                       | 0                                                   | 0                                                   | 1 (2.2)                                   | 0                                             | 0                                                   | 0                                                   | 0                                         |

Abbreviations: N = number of subjects in the population; n = number of subjects in the specific category. % = percentage of subjects with N as the denominator.

**Table S3. Summary of Unsolicited Adverse Events and Other Adverse Events**

|                                                | Group A:<br>Two Prior Doses of MVC-COV1901    |                                                     |                                                     |                                           | Group B:<br>Three Prior Doses of MVC-COV1901  |                                                     |                                                     |                                           |
|------------------------------------------------|-----------------------------------------------|-----------------------------------------------------|-----------------------------------------------------|-------------------------------------------|-----------------------------------------------|-----------------------------------------------------|-----------------------------------------------------|-------------------------------------------|
|                                                | MVC-COV1901<br>(15 mcg)<br>(N = 15),<br>n (%) | MVC-COV1901<br>(15 mcg, Beta)<br>(N = 15),<br>n (%) | MVC-COV1901<br>(25 mcg, Beta)<br>(N = 15),<br>n (%) | All<br>Participants<br>(N = 45),<br>n (%) | MVC-COV1901<br>(15 mcg)<br>(N = 21),<br>n (%) | MVC-COV1901<br>(15 mcg, Beta)<br>(N = 21),<br>n (%) | MVC-COV1901<br>(25 mcg, Beta)<br>(N = 20),<br>n (%) | All<br>Participants<br>(N = 62),<br>n (%) |
| Unsolicited AEs                                | 4 (26.7)                                      | 6 (40.0)                                            | 5 (33.3)                                            | 15 (33.3)                                 | 6 (28.6)                                      | 8 (38.1)                                            | 3 (15.0)                                            | 17 (27.4)                                 |
| Related Unsolicited AEs                        | 1 (6.7)                                       | 1 (6.7)                                             | 2 (13.3)                                            | 4 (8.9)                                   | 2 (9.5)                                       | 2 (9.5)                                             | 2 (10.0)                                            | 6 (9.7)                                   |
| Unsolicited AEs ≥ Grade 3                      | 0                                             | 0                                                   | 0                                                   | 0                                         | 0                                             | 0                                                   | 0                                                   | 0                                         |
| Related Unsolicited AEs ≥ Grade 3              | 0                                             | 0                                                   | 0                                                   | 0                                         | 0                                             | 0                                                   | 0                                                   | 0                                         |
| AEs ≥ Grade 3                                  | 0                                             | 0                                                   | 0                                                   | 0                                         | 0                                             | 0                                                   | 0                                                   | 0                                         |
| Related AEs ≥ Grade 3                          | 0                                             | 0                                                   | 0                                                   | 0                                         | 0                                             | 0                                                   | 0                                                   | 0                                         |
| SAEs                                           | 0                                             | 0                                                   | 0                                                   | 0                                         | 0                                             | 0                                                   | 0                                                   | 0                                         |
| Related SAEs                                   | 0                                             | 0                                                   | 0                                                   | 0                                         | 0                                             | 0                                                   | 0                                                   | 0                                         |
| AESI (including pIMD)                          | 0                                             | 0                                                   | 0                                                   | 0                                         | 0                                             | 0                                                   | 0                                                   | 0                                         |
| VAED                                           | 0                                             | 0                                                   | 0                                                   | 0                                         | 0                                             | 0                                                   | 0                                                   | 0                                         |
| AEs Leading to Intervention<br>Discontinuation | 0                                             | 0                                                   | 0                                                   | 0                                         | 0                                             | 0                                                   | 0                                                   | 0                                         |
| AEs Leading to Study Withdrawal                | 0                                             | 0                                                   | 0                                                   | 0                                         | 0                                             | 0                                                   | 0                                                   | 0                                         |
| Death                                          | 0                                             | 0                                                   | 0                                                   | 0                                         | 0                                             | 0                                                   | 0                                                   | 0                                         |

Abbreviations: N = number of subjects in the population; n = number of subjects with events; AE = Adverse Event; SAE = Serious Adverse Event; AESI = Adverse events of special interest; pIMD = potential immune mediated disorders; VAED = Vaccine-associated enhanced disease.

Table S4. Summary of immunogenicity data for Groups A and B

|                                                |             | Group A                        |                      |                                     |                      |                                     |                      |
|------------------------------------------------|-------------|--------------------------------|----------------------|-------------------------------------|----------------------|-------------------------------------|----------------------|
|                                                |             | MVC-COV1901<br>(15 mcg) (n=14) |                      | MVC-COV1901-Beta<br>(15 mcg) (n=12) |                      | MVC-COV1901-Beta<br>(25 mcg) (n=12) |                      |
|                                                |             | [GMT]                          | 95% CI               | [GMT]                               | 95% CI               | [GMT]                               | 95% CI               |
| WT (NT <sub>50</sub> )*                        | V2 (Day 1)  | <b>61.28</b>                   | (34.48, 108.91)      | <b>50.74</b>                        | (27.26, 94.44)       | <b>42.47</b>                        | (22.82, 79.03)       |
|                                                | V5 (Day 29) | <b>1352.00</b>                 | (797.38, 2292.40)    | <b>1805.02</b>                      | (1023.61, 3182.94)   | <b>3602.75</b>                      | (2036.68, 6373.05)   |
| WT GMT ratio**                                 | V5/V2       | <b>26.29</b>                   | (15.51, 44.58)       | <b>35.10</b>                        | (19.91, 61.90)       | <b>70.06</b>                        | (39.61, 123.94)      |
| Beta (NT <sub>50</sub> )*                      | V2 (Day 1)  | <b>9.75</b>                    | (5.57, 17.08)        | <b>6.29</b>                         | (3.43, 11.52)        | <b>5.99</b>                         | (3.27, 10.98)        |
|                                                | V5 (Day 29) | <b>225.59</b>                  | (128.13, 397.17)     | <b>931.34</b>                       | (509.33, 1703.00)    | <b>1476.85</b>                      | (806.39, 2704.76)    |
| Beta GMT ratio**                               | V5/V2       | <b>30.98</b>                   | (17.60, 54.55)       | <b>127.92</b>                       | (69.96, 233.91)      | <b>202.85</b>                       | (110.76, 371.51)     |
| Anti-spike IgG<br>(WT)                         | V2 (Day 1)  | <b>1384.95</b>                 | (876.59, 2188.12)    | <b>1301.00</b>                      | (793.82, 2132.21)    | <b>1073.76</b>                      | (655.17, 1759.79)    |
|                                                | V4 (Day 15) | <b>25878.60</b>                | (17387.24, 38516.84) | <b>32938.41</b>                     | (21459.28, 50558.02) | <b>43208.61</b>                     | (28085.34, 66475.38) |
|                                                | V5 (Day 29) | <b>25257.76</b>                | (16360.67, 38993.18) | <b>30672.19</b>                     | (19210.70, 48971.84) | <b>61907.00</b>                     | (38676.11, 99091.57) |
| IgG GMT ratio**                                | V4/V2       | <b>20.65</b>                   | (13.88, 30.74)       | <b>26.29</b>                        | (17.13, 40.35)       | <b>34.48</b>                        | (22.41, 53.05)       |
|                                                | V5/V2       | <b>20.16</b>                   | (13.06, 31.12)       | <b>24.48</b>                        | (15.33, 39.08)       | <b>49.41</b>                        | (30.87, 79.08)       |
| Pseudovirus NT<br>ID <sub>50</sub> (WT)        | V2 (Day 1)  | <b>45.12</b>                   | (98.07, 20.76)       | <b>35.97</b>                        | (19.84, 65.21)       | <b>40.62</b>                        | (26.33, 62.66)       |
|                                                | V4 (Day 15) | <b>1520.96</b>                 | (1023.93, 2259.24)   | <b>1723.40</b>                      | (1227.59, 2419.44)   | <b>2315.39</b>                      | (1879.03, 2853.08)   |
| Pseudovirus NT<br>ID <sub>50</sub> (BA.4/BA.5) | V2 (Day 1)  | <b>14.50</b>                   | (9.39, 22.38)        | <b>10.00</b>                        | (10.00, 10.00)       | <b>10.93</b>                        | (8.99, 13.30)        |
|                                                | V4 (Day 15) | <b>139.11</b>                  | (76.16, 254.09)      | <b>240.10</b>                       | (137.63, 418.86)     | <b>425.65</b>                       | (272.79, 664.17)     |
| Pseudovirus NT<br>ID <sub>90</sub> (WT)        | V2 (Day 1)  | <b>18.53</b>                   | (10.30, 33.33)       | <b>14.58</b>                        | (10.82, 19.63)       | <b>14.05</b>                        | (10.02, 19.68)       |
|                                                | V4 (Day 15) | <b>434.71</b>                  | (267.37, 706.78)     | <b>558.18</b>                       | (328.24, 949.20)     | <b>888.27</b>                       | (551.22, 1431.43)    |
| Pseudovirus NT<br>ID <sub>90</sub> (BA.4/BA.5) | V2 (Day 1)  | <b>11.58</b>                   | (9.33, 14.38)        | <b>10.00</b>                        | (10.00, 10.00)       | <b>10.00</b>                        | (10.00, 10.00)       |
|                                                | V4 (Day 15) | <b>54.52</b>                   | (30.41, 97.75)       | <b>92.95</b>                        | (57.80, 149.50)      | <b>157.99</b>                       | (105.15, 237.39)     |

|                                            |             | Group B                        |                      |                                     |                      |                                     |                      |
|--------------------------------------------|-------------|--------------------------------|----------------------|-------------------------------------|----------------------|-------------------------------------|----------------------|
|                                            |             | MVC-COV1901<br>(15 mcg) (n=17) |                      | MVC-COV1901-Beta<br>(15 mcg) (n=18) |                      | MVC-COV1901-Beta<br>(25 mcg) (n=18) |                      |
|                                            |             | [GMT]                          | 95% CI               | [GMT]                               | 95% CI               | [GMT]                               | 95% CI               |
| <b>WT (NT50)*</b>                          | V2 (Day 1)  | <b>292.89</b>                  | (220.46, 389.11)     | <b>253.89</b>                       | (192.56, 334.76)     | <b>263.29</b>                       | (198.18, 349.79)     |
|                                            | V5 (Day 29) | <b>867.93</b>                  | (629.98, 1195.74)    | <b>1124.98</b>                      | (824.29, 1535.36)    | <b>928.54</b>                       | (680.78, 1266.48)    |
| <b>WT GMT ratio**</b>                      | V5/V2       | <b>3.25</b>                    | (2.36, 4.47)         | <b>4.21</b>                         | (3.08, 5.74)         | <b>3.47</b>                         | (2.55, 4.74)         |
| <b>Beta (NT50)*</b>                        | V2 (Day 1)  | <b>34.02</b>                   | (21.76, 53.19)       | <b>25.09</b>                        | (16.24, 38.77)       | <b>31.17</b>                        | (19.94, 48.74)       |
|                                            | V5 (Day 29) | <b>147.14</b>                  | (102.32, 211.61)     | <b>459.23</b>                       | (322.19, 654.56)     | <b>323.78</b>                       | (227.68, 460.43)     |
| <b>Beta GMT ratio**</b>                    | V5/V2       | <b>5.03</b>                    | (3.49, 7.23)         | <b>15.69</b>                        | (11.01, 22.36)       | <b>11.06</b>                        | (7.78, 15.73)        |
| <b>Anti-spike IgG<br/>(WT)</b>             | V2 (Day 1)  | <b>6712.17</b>                 | (5261.78, 8562.35)   | <b>4620.77</b>                      | (3645.90, 5856.32)   | <b>5307.28</b>                      | (4160.46, 6770.21)   |
|                                            | V4 (Day 15) | <b>21078.01</b>                | (15675.17, 28343.06) | <b>28179.38</b>                     | (21170.75, 37508.24) | <b>21638.16</b>                     | (16216.34, 28872.72) |
|                                            | V5 (Day 29) | <b>19014.66</b>                | (14364.79, 25169.70) | <b>24953.2</b>                      | (19040.94, 32701.23) | <b>21889.96</b>                     | (16782.37, 28552.02) |
| <b>IgG GMT ratio**</b>                     | V4/V2       | <b>3.86</b>                    | (2.87, 5.19)         | <b>5.16</b>                         | (3.87, 6.87)         | <b>3.96</b>                         | (2.97, 5.28)         |
|                                            | V5/V2       | <b>3.48</b>                    | (2.63, 4.61)         | <b>4.57</b>                         | (3.49, 5.99)         | <b>4.01</b>                         | (3.07, 5.23)         |
| <b>Pseudovirus NT<br/>ID50 (WT)</b>        | V2 (Day 1)  | <b>611.33</b>                  | (400.87, 932.27)     | <b>388.14</b>                       | (271.86, 554.15)     | <b>408.18</b>                       | (254.72, 654.10)     |
|                                            | V4 (Day 15) | <b>1831.75</b>                 | (1449.69, 2314.49)   | <b>1919.17</b>                      | (1595.53, 2308.44)   | <b>1919.51</b>                      | (1613.19, 2284.00)   |
| <b>Pseudovirus NT<br/>ID50 (BA.4/BA.5)</b> | V2 (Day 1)  | <b>33.28</b>                   | (23.69, 46.76)       | <b>22.31</b>                        | (15.16, 32.83)       | <b>25.66</b>                        | (19.46, 33.84)       |
|                                            | V4 (Day 15) | <b>136.83</b>                  | (93.16, 200.95)      | <b>222.44</b>                       | (135.10, 366.22)     | <b>154.62</b>                       | (109.03, 219.28)     |
| <b>Pseudovirus NT<br/>ID90 (WT)</b>        | V2 (Day 1)  | <b>108.97</b>                  | (82.54, 143.87)      | <b>81.60</b>                        | (60.18, 110.66)      | <b>92.07</b>                        | (64.51, 131.40)      |
|                                            | V4 (Day 15) | <b>428.68</b>                  | (308.92, 594.85)     | <b>533.7</b>                        | (360.77, 789.53)     | <b>417.94</b>                       | (328.33, 532.01)     |
| <b>Pseudovirus NT<br/>ID90 (BA.4/BA.5)</b> | V2 (Day 1)  | <b>11.85</b>                   | (9.69, 14.50)        | <b>11.46</b>                        | (9.80, 13.42)        | <b>11.35</b>                        | (9.82, 13.12)        |
|                                            | V4 (Day 15) | <b>50.83</b>                   | (35.40, 72.98)       | <b>84.52</b>                        | (55.02, 129.83)      | <b>63.74</b>                        | (46.65, 87.10)       |

\*NT50 GMT and corresponding CI are calculated using an ANCOVA model with baseline log-titers, BMI (<30 or >=30 kg/m<sup>2</sup>) and comorbidity (yes or no) and sex (male or female) as covariate.

\*\*IU/mL was converted from NT50 GMT with the following formula:  $Y = 1.4663 \cdot (X^{0.8729})$ , where X = titer in NT50 GMT and Y = titer in IU/mL
